# Supplementary material for: Atomic layer deposition for perovskite solar cells: research status, opportunities and challenges
Source: Royal Society of Chemistry journal article supplement (doi:10.1039/c6se00076b), 2017-01-01
Supplement: c6se00076b1.pdf [file c6se00076b1.pdf]

## Supporting information

### *Analysis of the ALD processing over methylammonium lead iodide perovskite films*

Perovskite layers were fabricated in a N<sub>2</sub> filled glove box (H<sub>2</sub>O and O<sub>2</sub> < 0.1 ppm ) by spin coating a precursor solution composed by 0.8 mM of lead acetate trihydrate (99.999% from Sigma Aldrich), 0.2 mM of lead chloride (99.99% form Alfa Aesar) and 3 mM methylammonium iodide (from Dyesol) in 1 ml of N,N-dimethylformamide (anhydrous, from Sigma Aldrich).<sup>1</sup> The solution was spin coated on the substrate at 3000 RPM for 60 seconds and the films were annealed on an hotplate at 130°C for 10 minutes to form the perovskite structure.

Fabrication of ALD layers: ALD processes were carried out on two remote plasma ALD reactors: Oxford Instruments FlexAL™ and OpAL™ for Al<sub>2</sub>O<sub>3</sub>, TiO<sub>2</sub>, MoO<sub>3</sub> and ZnO processes while a home-built remote plasma reactor (Aldi-1) was used for NiO process. Their specifications are described elsewhere.<sup>2-4</sup> All the data about the ALD processes are reported in Table S2 for each metal oxide. The metal precursors Al(CH<sub>3</sub>)<sub>3</sub>, Ti(OCH(CH<sub>3</sub>)<sub>2</sub>)<sub>4</sub>, Zn(C<sub>2</sub>H<sub>5</sub>)<sub>2</sub> and Ni(C<sub>5</sub>H<sub>4</sub>CH<sub>3</sub>)<sub>2</sub> were purchased by Sigma Aldrich, while (NtBu)<sub>2</sub>(NMe<sub>2</sub>)<sub>2</sub>Mo by Strem Chemicals.

Table S2: The ALD process conditions for the metal oxides reported in this work.

|                                                   | <b>Al<sub>2</sub>O<sub>3</sub></b> | <b>Al<sub>2</sub>O<sub>3</sub></b> | <b>ZnO</b>                                      | <b>TiO<sub>2</sub></b>                               | <b>MoO<sub>3</sub></b>                                              | <b>NiO</b>                                                      |
|---------------------------------------------------|------------------------------------|------------------------------------|-------------------------------------------------|------------------------------------------------------|---------------------------------------------------------------------|-----------------------------------------------------------------|
| <i>Reactor</i>                                    | FlexAL™                            | OpAL™                              | OpAL™                                           | FlexAL™                                              | OpAL™                                                               | Aldi-I                                                          |
| <i>Precursor</i>                                  | Al(CH <sub>3</sub> ) <sub>3</sub>  | Al(CH <sub>3</sub> ) <sub>3</sub>  | Zn(C <sub>2</sub> H <sub>5</sub> ) <sub>2</sub> | Ti(OCH(CH <sub>3</sub> ) <sub>2</sub> ) <sub>4</sub> | Mo(N <sup>t</sup> Bu) <sub>2</sub> (NMe <sub>2</sub> ) <sub>2</sub> | Ni(C <sub>5</sub> H <sub>4</sub> CH <sub>3</sub> ) <sub>2</sub> |
| <i>T<sub>substrate</sub></i><br>(°C)              | 30-80                              | 80-120                             | 100-120                                         | 50-80                                                | 50-80                                                               | 50                                                              |
| <i>T<sub>precursor</sub></i><br>(°C)              | 25                                 | 25                                 | 25                                              | 45                                                   | 50                                                                  | 55                                                              |
| <i>Precursor dose(s)</i>                          | 0.04                               | 0.04                               | 0.05                                            | 4                                                    | 4                                                                   | 3                                                               |
| <i>Precursor purge</i><br>(s)                     | 3                                  | 5                                  | 5                                               | 5                                                    | 4                                                                   | 5                                                               |
| <i>H<sub>2</sub>O dose(s)</i>                     | --                                 | 0.1                                | 0.1                                             | --                                                   | --                                                                  | --                                                              |
| <i>O<sub>2</sub> plasma</i><br><i>exposure(s)</i> | 3                                  | --                                 | --                                              | 12                                                   | 4                                                                   | 3                                                               |
| <i>Plasma power (W)</i>                           | 100                                | --                                 | --                                              | 100                                                  | 100                                                                 | 100                                                             |
| <i>Oxidant purge</i><br>(s)                       | 3                                  | 5                                  | 6                                               | 3                                                    | 4                                                                   | 5                                                               |
| <i>Ar bubbling</i><br><i>flow(sscm)</i>           | --                                 | --                                 | --                                              | 50                                                   | 45                                                                  | 50                                                              |

XPS characterization: the chemical compositions of the perovskite layers and the ALD films deposited on top of them were analysed by X-ray photoelectron spectroscopy (XPS Thermo Scientific K-Alpha KA1066, monochromatic Al Ka ( $h\nu = 1486.6$  eV), X-ray spot: 400  $\mu$ m). In order to obtain information from the interface perovskite/ALD metal oxide, the nominal thickness of the ALD overlayer was maintained at 6 nm, lower than the escape depth of the electrons (almost 10 nm).

XRD characterization: The crystallinity of the pristine sample, thermally stressed, after co-reactant exposure, and after ALD metal oxide processes, were studied by X-ray diffraction (XRD; PanAlytical X'pert PRO MRD). The areas of the peaks relative to the perovskite structure at  $14.1^\circ$  and to the  $\text{PbI}_2$  at  $12.6^\circ$  were obtained fitting the data with a gaussian function. In the manuscript, the areas are displayed normalized to the one of the pristine sample.

- 1 W. Qiu, T. Merckx, M. Jaysankar, C. Masse de la Huerta, L. Rakocovic, W. Zhang, U. W. Paetzold, R. Gehlhaar, L. Froyen, J. Poortmans, D. Cheyns, H. J. Snaith and P. Heremans, *Energy Environ. Sci.*, 2016, **9**, 484–489.
- 2 Y. Wu, P. M. Hermkens, B. W. H. van de Loo, H. C. M. Knoop, S. E. Potts, M. A. Verheijen, F. Roozeboom and W. M. M. Kessels, *J. Appl. Phys.*, 2013, **114**, 24308.
- 3 S. B. S. Heil, J. L. van Hemmen, M. C. M. van de Sanden and W. M. M. Kessels, *J. Appl. Phys.*, 2008, **103**, 103302.
- 4 E. Langereis, H. C. M. Knoop, A. J. M. Mackus, F. Roozeboom, M. C. M. van de Sanden and W. M. M. Kessels, *J. Appl. Phys.*, 2007, **102**, 83517.
